# Supplementary material for: Multi-Modality, Multi-Dimensional Characterization of Pediatric Non-Alcoholic Fatty Liver Disease
Source: MDPI journal article supplement (doi:10.3390/metabo13080929), 2023-08-08

# Histopathological Measurement Histograms

Ballooning

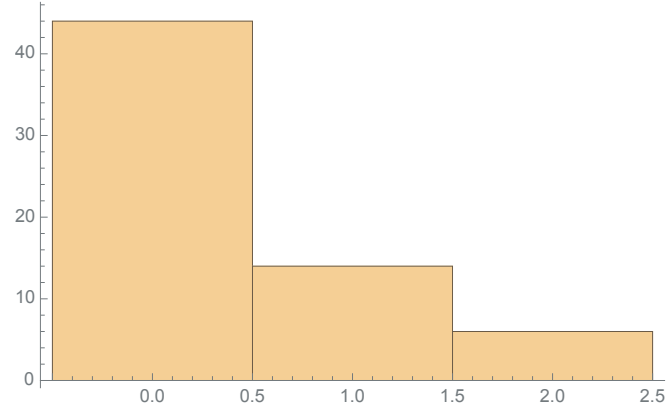

Fibrosis

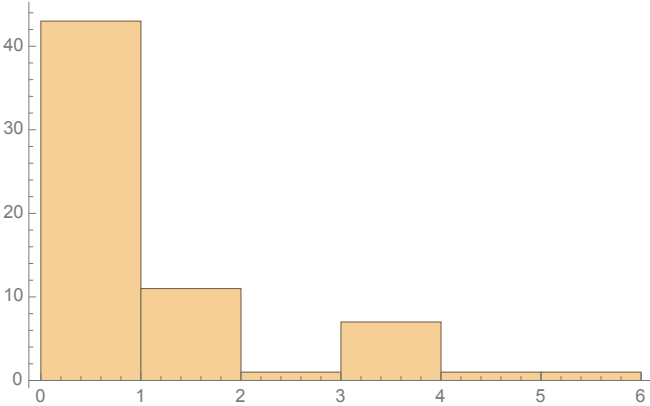

Steatosis

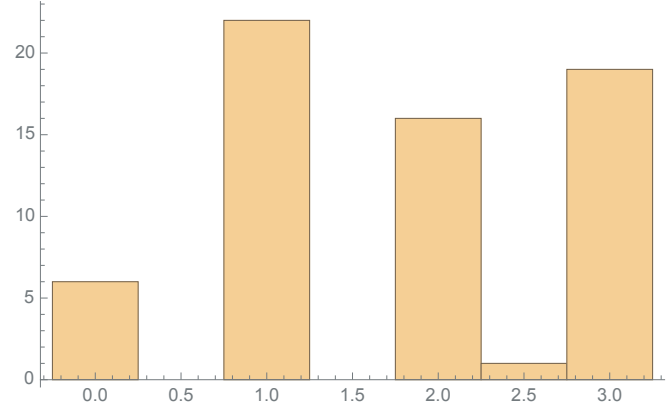

Lob. Infl.

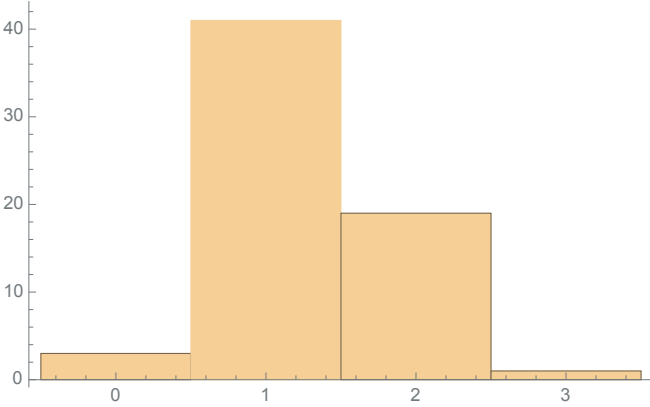

NAS SCORE

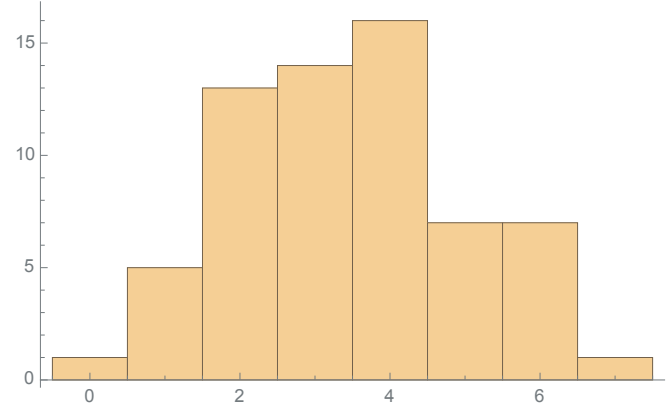

Supplement: s1 [file s1]
